# Supplementary material for: Induction of Mixed Chimerism With MHC-Mismatched but Not Matched Bone Marrow Transplants Results in Thymic Deletion of Host-Type Autoreactive T-Cells in NOD Mice
Source: Oxford University Press journal article supplement (doi:10.2337/db10-0827), 2011-01-21

# SUPPLEMENTARY DATA

**Supplementary Table 1. % Donor- and host-type blood mononuclear cells in mixed chimeric NOD at different time points after MHC-mismatched HCT**

(Mean  $\pm$  SE, N=4)

|          |            | TCR $\beta^+$   | B220 $^+$       | MAC1/Gr1 $^+$  |
|----------|------------|-----------------|-----------------|----------------|
| 3 Weeks  | Donor-type | 26.6 $\pm$ 9.1  | 599 $\pm$ 12.1  | 12.7 $\pm$ 3.0 |
|          | Host-type  | 73.4 $\pm$ 9.1  | 40.1 $\pm$ 12.1 | 87.3 $\pm$ 3.0 |
| 7 Weeks  | Donor-type | 61.3 $\pm$ 7.7  | 60.6 $\pm$ 17.6 | 22.3 $\pm$ 7.3 |
|          | Host-type  | 38.7 $\pm$ 7.7  | 39.4 $\pm$ 17.6 | 77.7 $\pm$ 7.3 |
| 14 Weeks | Donor-type | 59.4 $\pm$ 16.3 | 55.2 $\pm$ 16.8 | 23.8 $\pm$ 6.6 |
|          | Host-type  | 40.6 $\pm$ 16.3 | 44.8 $\pm$ 16.8 | 76.2 $\pm$ 6.6 |

NOTE: Donor-type cells were defined as H-2k $^{b+}$  and host-type cells were defined as H-2k $^{b-}$ ; no significant difference was found with percentage of donor- or host-type cells between 7 and 14 weeks after HCT.

**Supplementary Table 2. % H-2k $^{b+}$  or H-2k $^{b-}$  T, B, Macrophages/granulocyte, and dendritic cells in spleen of C57BL/6**

(Mean  $\pm$  SE, N=4)

|         |              | TCR $\beta^+$ | B220 $^+$      | MAC1/Gr1 $^+$  | CD11c $^+$     |
|---------|--------------|---------------|----------------|----------------|----------------|
| C57BL/6 | H-2k $^{b+}$ | 100 $\pm$ 0   | 99.0 $\pm$ 0.2 | 92.0 $\pm$ 1.8 | 98.7 $\pm$ 0.5 |
|         | H-2k $^{b-}$ | 0 $\pm$ 0     | 1.0 $\pm$ 0.2  | 8.0 $\pm$ 1.8  | 1.3 $\pm$ 0.5  |

SUPPLEMENTARY DATA

**Supplementary Figure 1. Mixed chimerism in NOD recipients conditioned with radiation free anti-CD3 based regimen.** WT NOD mice were conditioned with anti-CD3/CD8 (5µg each) on days -10 and -5. On day 0, the conditioned mice were transplanted with graded doses (5-20x10<sup>6</sup> each) of CD4<sup>+</sup> T cell-depleted splenocytes and whole BM from WT C57BL/6 donors to induce chimerism. Chimerism was judged by analysis of donor- and host-type peripheral blood mononuclear cells at 3, 7, and 14 weeks after HCT. One representative of 4 examined mice is shown.

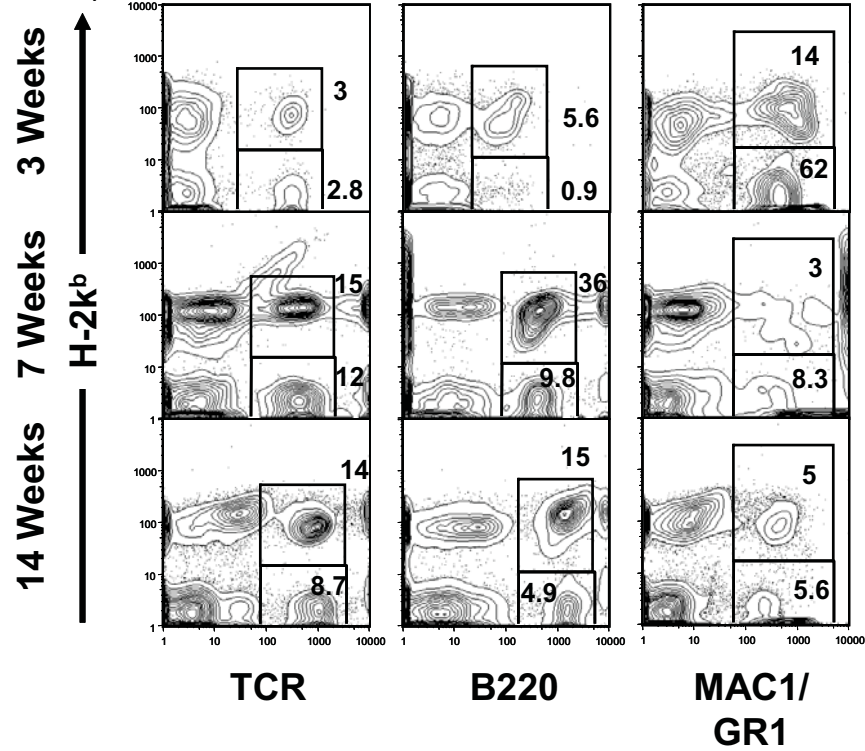

SUPPLEMENTARY DATA

Supplementary Figure 2. Representative insulinitis levels from Conditioning Alone mice, ~70 days after first round of conditioning. Brown – Insulin.

**No  
Insulinitis**  
**Peri  
Insulinitis**  
**Insulinitis**

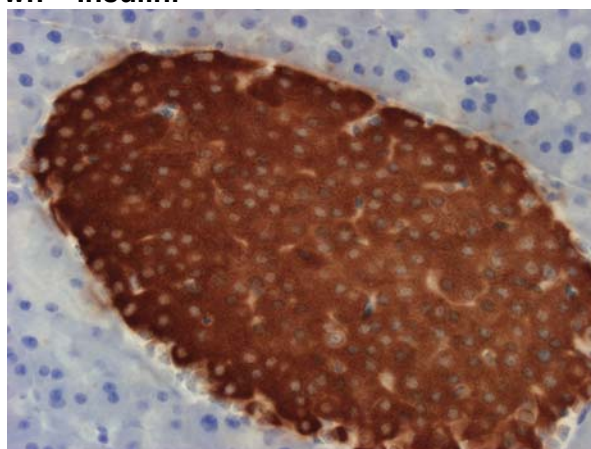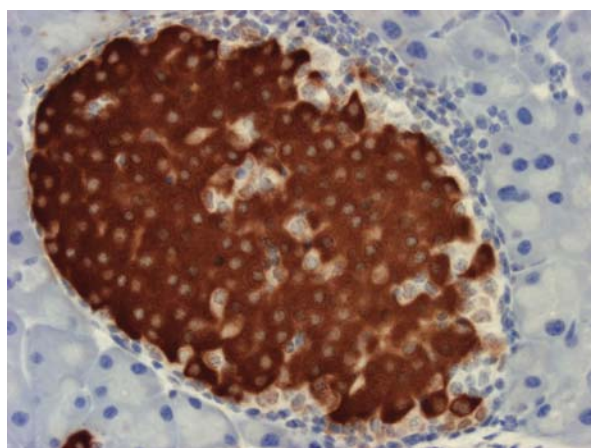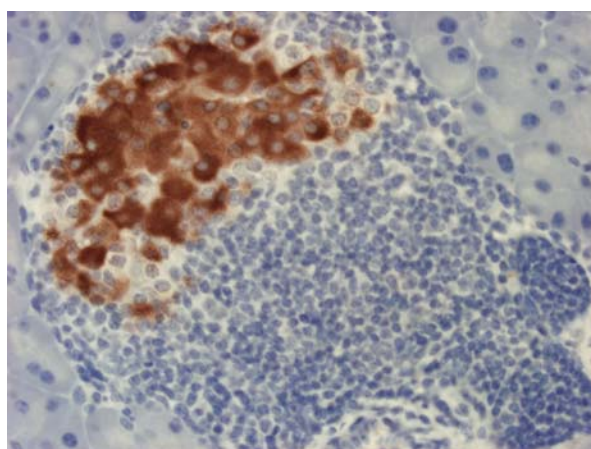

40x

# SUPPLEMENTARY DATA

**Supplementary Figure 3. Donor-type control staining.** Spleen, BM, and thymus cells of WT C57BL/6 donors were stained with anti-H-2k<sup>b</sup> vs anti-TCR $\beta$ , B220, MAC-1/Gr-1 or CD11c. Expression of H-2k<sup>b</sup> by TCR $\beta$ <sup>+</sup> T cells, B220<sup>+</sup> B cells, MAC-1/Gr-1<sup>+</sup> macrophages/granulocytes, and CD11c<sup>+</sup> DCs from spleen (A), BM (B), and thymus (C) are shown. One representative of 4 examined mice is shown.

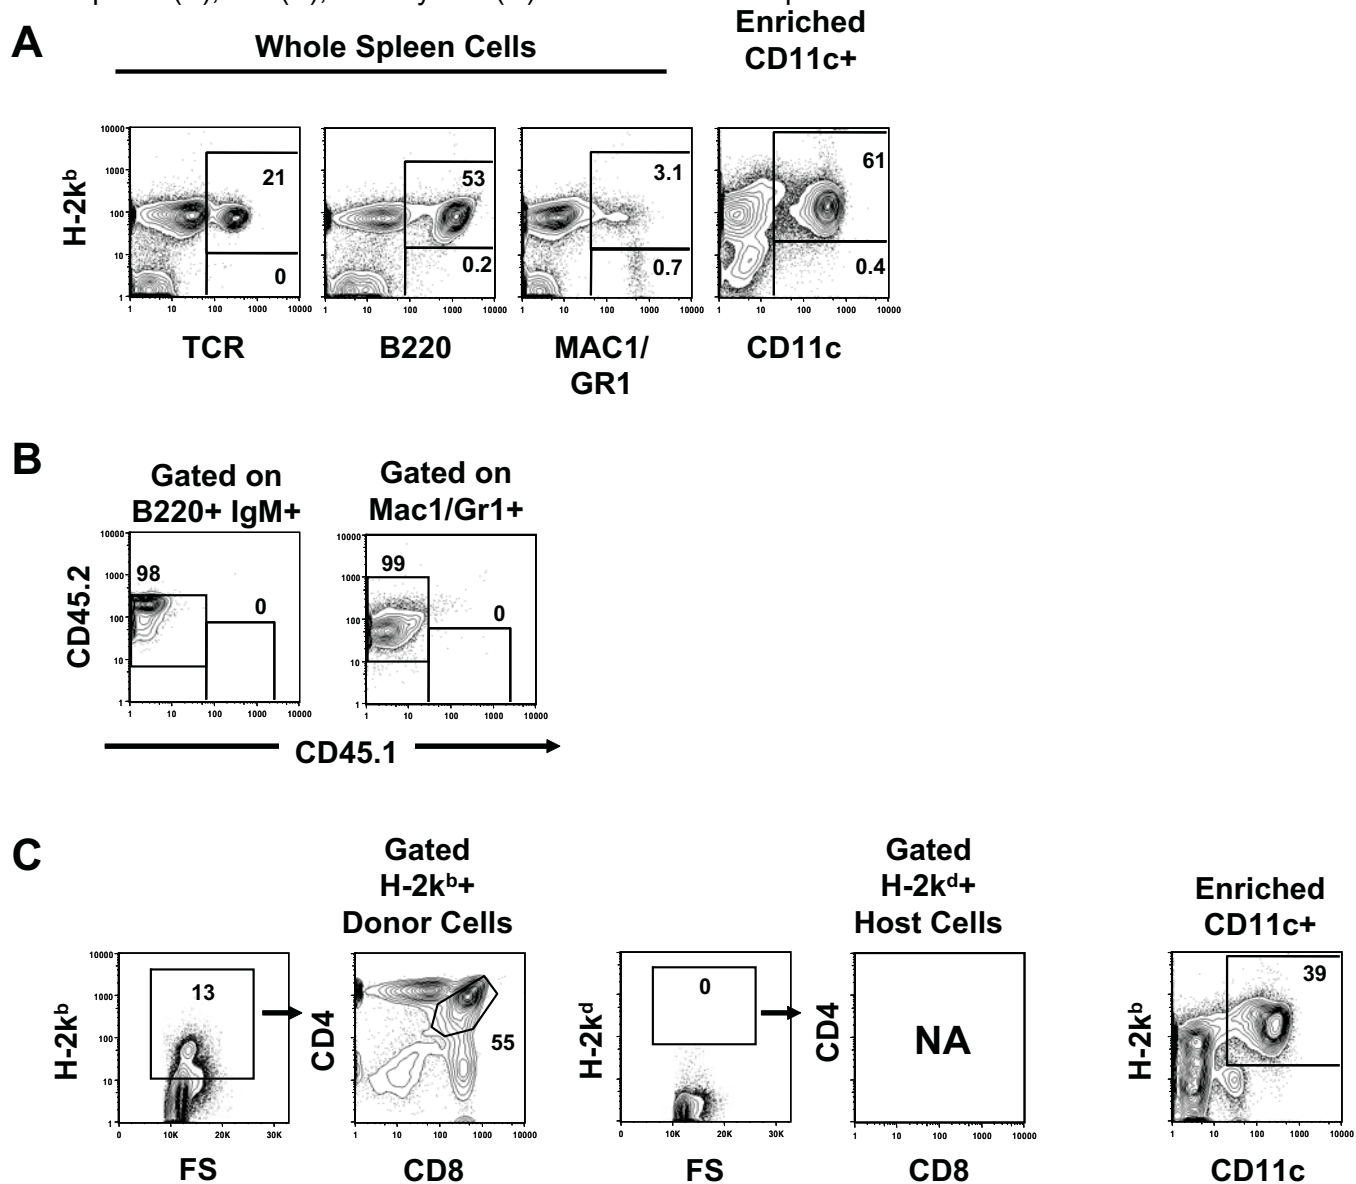

SUPPLEMENTARY DATA

**Supplementary Figure 4 - No expansion of T cells expressing transgenic TCR Vβ4 coupled with endogenous Vas in mixed chimeric BDC2.5-NOD recipients.** Transgenic BDC2.5 NOD were conditioned with anti-CD3 (5μg) on day -7. On day 0, the conditioned mice were transplanted with BM cells (50x10<sup>6</sup>) from C57BL/6 donors. 60 days after HCT, peripheral blood mononuclear cells were analyzed for Vβ4<sup>+</sup> CD4<sup>+</sup> T cell expression of endogenous Vα2, Vα8.3 and Vα11. WT-NOD and BDC2.5-NOD without HCT were used as controls. Gated CD45.2<sup>+</sup> Vβ4<sup>+</sup>CD4<sup>+</sup> or Vβ4<sup>+</sup>CD4<sup>+</sup> host-type T cells are shown in Vβ4 vs Vα2, Vα8.3, Vα11. One representative staining pattern of 4 examined mice is shown. Mean±SE of Vβ4<sup>+</sup>Vα<sup>+</sup> or Vβ4<sup>+</sup>Vα<sup>+</sup> cells amongst gated CD4<sup>+</sup> T cells is shown.

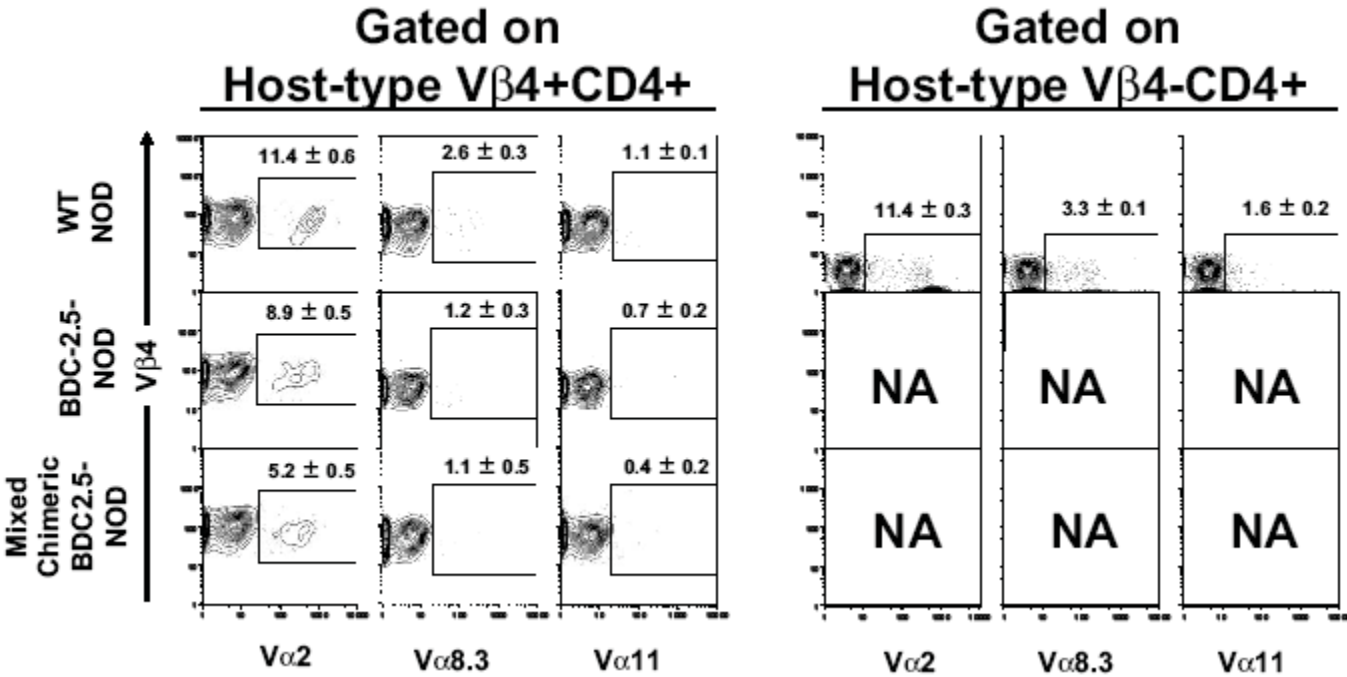

Supplement: db100827supplementarydata.pdf [file db100827supplementarydata.pdf]
